# Supplementary material for: Predicting protein functions using incomplete hierarchical labels
Source: BMC Bioinformatics. 2015 Jan 16;16:1. doi: 10.1186/s12859-014-0430-y (PMC4384381; doi:10.1186/s12859-014-0430-y)
Supplement: Additional file 2 — Real life examples. This txt file includes the real life examples of correctly replenished labels for proteins by PILL. This file can be accessed by the link in the reference [44]. [file 12859_2014_430_MOESM2_ESM.pdf]

%%% Note, in each pair rows, the first row is the original GO annoatations (before 2014-02-01).
%%% the second row (started with PILL) is the correctly relenished GO annoatations by PILL (between 2014-02-01 and 2014-06-01).

%% 117 proteins were added new annotations (from 2014-02-01 to 2014-06-01)
%% Total added annotations: 451
%% PILL correctly replenished annotations: 137
%% PILL correctly replenished (with correct replenished ones' ancestor labels):
%% 0.3038=137/451
%% 0.4080= 184/451

YER133W->GO:0005977,GO:0030437,GO:0007126,GO:0007059,GO:0034501,GO:0007094,GO:0051726,GO:0006364,GO:0000077,GO:0000903,GO:0000076,GO:0007346,GO:0006470,GO:0007114,GO:0006873,GO:0035307,GO:0070940,GO:0009408,GO:0006109,GO:0016576,GO:0030846,GO:0030847,GO:0031297
PILL->

YOR206W->GO:0042255,GO:0000054
PILL->GO:0042273

YOR048C->GO:0006364,GO:0006396,GO:0071028,GO:0030846,GO:0030847
PILL->

YOR204W->GO:0006413
PILL->GO:0006139,GO:0016043,GO:0006396,GO:0006807,GO:0016070,GO:0006725

YIL126W->GO:0006355,GO:0007126,GO:0007059,GO:0043044,GO:0006368,GO:0006337,GO:0016584,GO:0007010,GO:0000086,GO:0006302,GO:0031055
PILL->GO:0006357

YML127W->GO:0006338,GO:0006357,GO:0043044,GO:0006368,GO:0006337,GO:0000086,GO:0070301,GO:0009303
PILL->

YGR104C->GO:0045944,GO:0051123,GO:0001113
PILL->GO:0006353,GO:0006369

YMR235C->GO:0006606,GO:0006348,GO:0016072,GO:0006399,GO:0000054,GO:0006404,GO:0006407
PILL->

YPL153C->GO:0006281,GO:0008104,GO:0006270,GO:0006139,GO:0006468,GO:0000077,GO:0009202
PILL->

YAL041W->GO:0000282,GO:0007264,GO:0007096
PILL->

YDR108W->GO:0007126,GO:0006888,GO:0016236,GO:0032258,GO:0034727,GO:0030242,GO:0034497,GO:0016050
PILL->GO:0000045

YHR064C->GO:0002181,GO:0006364,GO:0006450
PILL->

YGR285C->GO:0006457,GO:0006364,GO:0006450,GO:0000054
PILL->GO:0009058,GO:0006412,GO:0009059,GO:0044249

YFR028C->GO:0007096,GO:0006470,GO:0000278,GO:0051304
PILL->GO:0016043,GO:0007010

YNL330C->GO:0001302,GO:0045944,GO:0000122,GO:0000083,GO:0034401,GO:0006368,GO:0016239,GO:0030174,GO:0061408,GO:0034503,GO:0031939,GO:0061188,GO:0061186,GO:0000117,GO:0070932,GO:0070933,GO:0045128,GO:0016479,GO:0051038
PILL->

YOL004W->GO:0045944,GO:0000122,GO:0030174,GO:0061408,GO:0016575,GO:0031939,GO:0061188,GO:0061186,GO:0006303,GO:0000117,GO:0016479,GO:0051038
PILL->

YGL246C->GO:0000956,GO:0000463,GO:0000466,GO:0030846
PILL->

YDR028C->GO:0005977,GO:0000122,GO:0007039,GO:0042149,GO:0006109
PILL->

YGL190C->GO:0001100,GO:0034504,GO:0006470,GO:0010971,GO:0000078
PILL->GO:0006355

YNR011C->GO:0000349
PILL->GO:0034247

YGR167W->GO:0006897,GO:0016192
PILL->

YNL138W->GO:0007265,GO:0007010,GO:0051014
PILL->GO:0030036,GO:0007015

YEL015W->GO:0031087,GO:0033962
PILL->

YBR009C->GO:0006333,GO:0034729,GO:0043935
PILL->GO:0006355,GO:0006357,GO:0045892,GO:0010629,GO:0006342,GO:0016458

YBL038W->GO:0032543
PILL->

YBR136W->GO:0006260,GO:0006139,GO:0000723,GO:0006310,GO:0007131,GO:0006975,GO:0016572,GO:0000722
PILL->

YOL012C->GO:0030466,GO:0006357,GO:0070481
PILL->GO:0006338,GO:0016568,GO:0006325,GO:0016043,GO:0051276

YOR141C->GO:0006974,GO:0006338,GO:0006312
PILL->GO:0006281,GO:0006302

YBR089C-A->GO:0006366,GO:0006338,GO:0070898
PILL->GO:0006354

YER178W->GO:0006086
PILL->

YBR044C->GO:0034553
PILL->

YNL102W->GO:0006260,GO:0006270,GO:0006278,GO:0000076,GO:0006273,GO:0006279,GO:0006271,GO:0000731,GO:0000734,GO:0006269
PILL->GO:0006302

YKL045W->GO:0006260,GO:0006270,GO:0006273,GO:0000731,GO:0006269
PILL->GO:0006302

YDR225W->GO:0006281,GO:0000122,GO:0006333
PILL->GO:0006342

YGL197W->GO:0031929,GO:0042174
PILL->

YER171W->GO:0006366,GO:0070816,GO:0000019,GO:0033683,GO:0010525
PILL->

YBR095C->GO:0000122,GO:0001403,GO:0000747,GO:0031939,GO:0061188,GO:0061186
PILL->

YMR075W->GO:0006368,GO:0030174,GO:0016575,GO:0060195
PILL->GO:0006357,GO:0006342

YDR005C->GO:0016480
PILL->GO:0006357,GO:0009987

YER068W->GO:0016567,GO:0032968,GO:0000209,GO:0031087
PILL->GO:0044257,GO:0030163

YHR114W->GO:0006897,GO:0009651,GO:0007015
PILL->GO:0045010

YKL196C->GO:0006891,GO:0006906,GO:0042144
PILL->GO:0006888

YDR477W->GO:0001302,GO:0007155,GO:0006468,GO:0001403,GO:0017148,GO:0006995,GO:0007124,GO:0042710,GO:0006109,GO:1900436,GO:0045722
PILL->GO:0016043

YER129W->GO:0006261,GO:0006468,GO:0006006
PILL->GO:0030447,GO:0044182

YDL149W->GO:0000422,GO:0032258,GO:0044805,GO:0000045,GO:0034727,GO:0051260
PILL->GO:0034497

YIL033C->GO:0046580
PILL->GO:0051173

YLR337C->GO:0030036,GO:0006897,GO:0051666,GO:0007015,GO:0007121
PILL->

YAL026C->GO:0006897,GO:0006886,GO:0006892,GO:0045332,GO:0000028
PILL->

YER088C->GO:0006357,GO:0006348,GO:0000183,GO:0030447,GO:0009826
PILL->GO:0000122

YML074C->GO:0051598,GO:0018208,GO:0000412
PILL->GO:0006139,GO:0006333,GO:0006807,GO:0006334,GO:0006259,GO:0006725

YER125W->GO:0045944,GO:0042493,GO:0032956,GO:0070086,GO:0006333,GO:0007005,GO:0032880,GO:0034517,GO:0000209,GO:0006513,GO:0043161,GO:0051865,GO:0042787,GO:0032443,GO:0032511,GO:0043162,GO:0045807,GO:0010793,GO:0034644,GO:0006808,GO:2000235,GO:2000238,GO:2000232,GO:2000203,GO:0048260,GO:0045723,GO:0019220,GO:0010796,GO:0010794,GO:0010795
PILL->

YMR001C->GO:0006468,GO:0010696,GO:0090306,GO:0000712,GO:0070194
PILL->

YJR090C->GO:0006974,GO:0016567,GO:0000082,GO:0071406,GO:0031146,GO:0000751
PILL->

YMR058W->GO:0046688,GO:0006827,GO:0033215
PILL->GO:0006820

YJR104C->GO:0031505,GO:0050821,GO:0019430,GO:0006801,GO:0006882,GO:0006878,GO:0051091,GO:0001320,GO:1901856
PILL->

YDL164C->GO:0006284,GO:0000278,GO:0006273,GO:0006310,GO:0006289,GO:0006266
PILL->GO:0016043,GO:0051276

YBR088C->GO:0030466,GO:0006348,GO:0007064,GO:0006273,GO:0006289,GO:0006301,GO:0006298,GO:0006272,GO:0000710
PILL->GO:0044271,GO:0070987,GO:0019985

YNL098C->GO:0001302,GO:0030437,GO:0032880,GO:0007124,GO:0007265,GO:0000411,GO:0007190
PILL->

YOR101W->GO:0001302,GO:0007265,GO:0007189
PILL->GO:0008104,GO:0034613

YOR191W->GO:0006333,GO:0007533
PILL->

YNL004W->GO:0016973
PILL->GO:0006139,GO:0016071,GO:0044237,GO:0009987,GO:0006807,GO:0016070,GO:0006725

YCL011C->GO:0000723,GO:0016973
PILL->GO:0016071,GO:0016070

YDR194C->GO:0000372,GO:0000373,GO:0034337
PILL->GO:0009058,GO:0006351,GO:0044271,GO:0007005,GO:0016043,GO:0009059,GO:0044249,GO:0006390

YKL113C->GO:0001302,GO:0006303,GO:0000734,GO:0043137,GO:0006286
PILL->GO:0016043,GO:0051276

YPL218W->GO:0003400
PILL->GO:0016050,GO:0016043

YLR113W->GO:0045944,GO:0034605,GO:0006468,GO:0046685,GO:0006972,GO:0046020,GO:0071470,GO:0007231
PILL->GO:0036003,GO:0061392,GO:0061393

YPL026C->GO:0045944,GO:0006468,GO:0015758,GO:0009749
PILL->

YKL054C->GO:0006974,GO:0006511,GO:0000723,GO:0006283
PILL->GO:0006464,GO:0016567,GO:0032446

YDR419W->GO:0070987,GO:0042276
PILL->GO:0016043

YOR167C->GO:0002181,GO:0006407
PILL->

YLR319C->GO:0051017,GO:0030010,GO:0007121,GO:0032880,GO:0007118,GO:2000251,GO:0034652,GO:0090338,GO:0030953
PILL->

YML121W->GO:0006348,GO:0006360,GO:0006817,GO:0006383,GO:0032008
PILL->

YLR264W->GO:0002181,GO:0006407
PILL->

YGL175C->GO:0042138,GO:0000706,GO:0000729,GO:0031292,GO:0000737
PILL->

YNL012W->GO:0007126,GO:0070583
PILL->

YBL102W->GO:0006895
PILL->GO:0042147

YNL209W->GO:0002181,GO:0006364,GO:0051083,GO:0006450,GO:0042149,GO:0000054
PILL->

YDL229W->GO:0002181,GO:0006364,GO:0051083,GO:0006450,GO:0006415,GO:0042149,GO:0000054
PILL->

YGL223C->GO:0006891,GO:0032258,GO:0000301
PILL->GO:0009987,GO:0016043

YPR052C->GO:0006338,GO:0070898,GO:0051123,GO:0006298,GO:0034724
PILL->GO:0006354

YPR163C->GO:0002181,GO:0006413
PILL->GO:0016043

YBR275C->GO:0030466,GO:0000723,GO:0016233
PILL->GO:0006950,GO:0006974,GO:0006281,GO:0019439

YDL106C->GO:0006338,GO:0045944,GO:0000105,GO:0009113,GO:0043388,GO:0045937
PILL->GO:2000679

YGL086W->GO:0007094,GO:0044774,GO:0006913,GO:1901925
PILL->

YPR068C->GO:0045944,GO:0070933,GO:0034983
PILL->GO:0000122,GO:0045892,GO:0010629

YJR066W->GO:0006974,GO:0031505,GO:0007126,GO:0042254,GO:0031929,GO:0001558,GO:0007165,GO:0051726,GO:0006413,GO:0031930,GO:0042790,GO:0010507
PILL->

YNL183C->GO:0006468,GO:0006808,GO:0045806,GO:0022898
PILL->GO:0090153

YJL204C->GO:0006897,GO:0034498
PILL->GO:0032456

YDR057W->GO:0030433,GO:0030968
PILL->GO:0006810,GO:0046907

YKL092C->GO:0007121,GO:0046580,GO:0007120,GO:0031578,GO:0030447,GO:0007163,GO:0032320
PILL->

YLR014C->GO:0045944
PILL->

YHR031C->GO:0006260,GO:0000002,GO:0097046
PILL->

YOL013C->GO:0031505,GO:0030433,GO:0030968
PILL->

YDR363W-A->GO:0006887,GO:0043248,GO:0006511,GO:0006406,GO:0051726,GO:0030447,GO:0043161
PILL->GO:0006139,GO:0006807,GO:0006259,GO:0006725

YOR133W->GO:0045901,GO:0006414
PILL->

YBR106W->GO:0006817
PILL->GO:0008152,GO:0019538

YLR207W->GO:0030433
PILL->

YDR533C->GO:0034599,GO:0019243
PILL->

YLR087C->GO:0006113
PILL->GO:0019538

YJR152W->GO:0015719,GO:0042938
PILL->GO:0042939

YMR069W->GO:0016573
PILL->GO:0006355

YOR094W->GO:0051017,GO:0006897,GO:0051666,GO:0000282,GO:0006886,GO:0010513
PILL->GO:0030447

YBR159W->GO:0030497
PILL->GO:0006807

YIL135C->GO:0000082
PILL->GO:0051301,GO:0016043

YJL102W->GO:0006414
PILL->GO:0032543,GO:0016043

YER145C->GO:0055085,GO:0006827,GO:0033215
PILL->GO:0006820

YGR271C-A->GO:0000462,GO:2000045
PILL->

YML060W->GO:0006281,GO:0006285
PILL->GO:0009058,GO:0006260,GO:0044271,GO:0070987,GO:0006301,GO:0044249,GO:0019985

YKL134C->GO:0006879,GO:0006627
PILL->

YER128W->GO:0007034
PILL->

YBR201W->GO:0030433
PILL->GO:0008104,GO:0034613

YDR497C->GO:0055085,GO:0015798
PILL->

YMR292W->GO:0006888,GO:0006895
PILL->GO:0042147

YHL023C->GO:0007126,GO:0032007,GO:2000785,GO:0034198
PILL->

YML061C->GO:0000002,GO:0000723,GO:0000727,GO:0006310,GO:0051276,GO:0032211
PILL->

YKR050W->GO:0030007
PILL->

YMR244C-A->GO:0033617
PILL->  
